# Supplementary material for: Single-walled carbon nanotubes as anisotropic relaxation probes for magnetic resonance imaging
Source: Royal Society of Chemistry journal article supplement (doi:10.1039/c3md20235f), 2013-01-01
Supplement: c3md20235f.pdf [file c3md20235f.pdf]

Cite this: DOI: 10.1039/c0xx00000x

www.rsc.org/xxxxxx

ARTICLE TYPE

## Single-Walled Carbon Nanotubes as Anisotropic Relaxation Probes for Magnetic Resonance Imaging

Arisbel Cerpa,<sup>a</sup> Mariana Köber,<sup>b</sup> Daniel Calle,<sup>c</sup> Viviana Negri,<sup>d</sup> Jose María Gavira,<sup>e</sup> Antonio Hernandez,<sup>e</sup> Fernando Briones,<sup>b</sup> Sebastián Cerdán,<sup>c</sup> and Paloma Ballesteros,<sup>d\*</sup>

Received (in XXX, XXX) Xth XXXXXXXXXX 20XX, Accepted Xth XXXXXXXXXX 20XX

DOI: 10.1039/b000000x

† Electronic Supplementary Information (ESI) available:

**TXRF of metal contaminants before and after different oxidation times.**

Supplementary Table I shows the results of TXRF analysis of the SNCNTs preparations before and after 24 or 48h oxidations, respectively. The oxidation protocol resulted in significant decreases in the paramagnetic metal content of the non oxidized starting materials.

**Supplementary Table 1.** TXRF analysis of the SNCNTs preparations before and after 24 or 48h oxidations.

|                    | [Total]<br>(ppm) | [Ni]<br>(ppm) | Ni<br>SCNWTs<br>(%) | [Y]<br>(ppm) | Y<br>SCNWTs<br>(%) |
|--------------------|------------------|---------------|---------------------|--------------|--------------------|
| Untreated          | 802              | 141.14        | 17.6                | 34.75        | 4.3                |
| 24 hr<br>oxidation | 1132.5           | 35.939        | 3.2                 | 7.296        | 0.64               |
| 48 hr<br>oxidation | 1133             | 66.741        | 5.9                 | 13.302       | 1.17               |

### Cellular Toxicity

We investigated cellular toxicity of SWCNTs oxidized for 24h using two different methods, either assessing mitochondrial function (MTT assay) or plasma membrane integrity (LDH assay), respectively. C6 cells were grown to confluence in Dulbecco's Modified Eagle Medium (DMEM) using 96 well plates. SWCNTs suspensions prepared on Fetal Bovine Serum (FBS) (Gibco, Life Technologies, Alcobendas, Madrid, ES) as described above, were added to each well in final concentrations of 1, 10, 100 and 1000  $\mu\text{g mL}^{-1}$ , using three cell replicas for every SWCNTs concentration. The viability of the cellular preparations was determined spectrophotometrically (570nm, Spectramax, Molecular Devices, Downington, PA,

USA) 1h and 24h after the addition of the different SWCNTs suspensions, using commercial kits to determine mitochondrial performance as the reduction of tetrazolium salts (MTT, Millipore, Billerica, MA, USA) (Suppl. Figure 1, left panels). As blank we used the medium from cells incubated in the absence of SWCNTs while cell death was induced by adding the toxic hydrazine (5 mM) to the incubation medium. We observed approximately 100 % cell viability in the absence of SWCNTs and roughly nulle viability in cells exposed to the toxic. A decrease in formazan production was detected at the highest SWCNTs concentrations, a finding that has been described previously to be due to a direct reaction of the nanotubes with the MTT molecule, rather to a citotoxic effect on the cells <sup>Suppl. ref. 1</sup>. To further investigate cytotoxicity, we performed additional tests using the same SWCNTs preparation but measuring the release of lactate dehydrogenase (LDH) from the cell suspensions as an indicator of plasma membrane integrity and cell viability (Suppl. Figure 1, right panels). Briefly, SWCNTs were added to each well to final concentrations in the 1-1000  $\mu\text{g mL}^{-1}$  range. LDH activity was determined spectrophotometrically (340 nm, Spectramax, Molecular Devices, Downington, PA, USA) following the linear decrease in NADH absorbance in mixtures containing 50 mM HEPES pH: 7.0, 5 mM pyruvate and 0.6 mM NADH. We initiated the reaction with the addition of either aliquots from the incubation medium or from the cell lysate obtained after four cycles of freezing and thawing. We used as blanks, aliquots of the incubation medium containing no SWCNTs and as a maximum LDH release, that induced by adding the detergent sodium dodecylsulfate (2%) to the cell suspensions. We determined then the fractional LDH released (LDH medium/(LDH medium+LDH lysate) either after 1h or 24h incubations. While we observed no significant fractional LDH release in the blanks or close to 90 % after detergent treatment as expected, we detected no significant increase in fractional LDH release with increasing concentrations of SWCNTs either after 1h or 24h incubations. Taken together, our results revealed no significant cytotoxic effects of our SWCNTs preparations in the concentrations required for observable magnetic anisotropy effects.

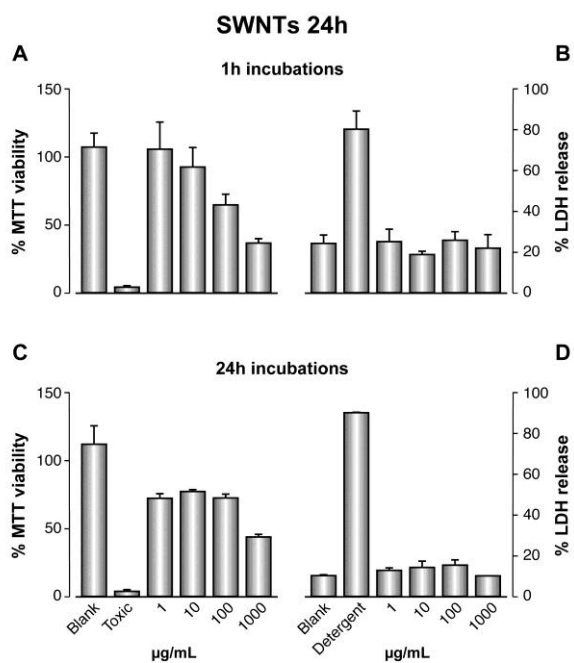

**Supplementary Figure 1.** MTT assays (left column) and fractional LDH release assays (right column) of cellular viability for increasing concentrations of SWCNTs oxidized with nitric acid for 24h, either 1h (top row) or 24h (bottom row) after the addition to the cells of the SWCNTs suspensions (1-1000  $\mu\text{g}\cdot\text{mL}^{-1}$ ) in Fetal Bovine Serum.

**Supplementary Bibliography**

Suppl Ref. 1. Wörle-Knirsch, J.M., Pulskamp, K., Krug, H.F., *Nanoletters* 2006, **6**,1261-68.

See DOI: 10.1039/b000000x/
